# Supplementary material for: Linkage of tropical glaciation to supercontinents: a thermodynamic closure model
Source: Copernicus journal article supplement (doi:10.5194/esd-2023-32), 2023-12-11
Supplement: Supplementary file [file esd-2023-32-AC1-supplement.pdf]

First of all I want to clarify that I was not familiar with the concept of maximum entropy production (MEP) before reviewing this manuscript and therefore will not attempt to judge, whether the basic and additional assumptions of this concept are valid here. Thus, I put my focus on whether I can follow the arguments presented here and how to align the conclusions with previous studies.

I first answer some general questions regarding the manuscript. Then I provide a general comment, as well as some specific further remarks and references supporting my comments.

- *Thank you for the unusually insightful and detailed comments, which have further crystallized my own thinking. Since you have waived anonymity, I shall acknowledge your comments explicitly in the revised paper.*
- *MEP is indeed unfamiliar to most modelers, but its predicate of an eddying ocean is difficult to bypass unless models have resolved eddies—significant carriers of OHT. To aid the understanding of MEP, I shall add the differential heat equation in Section 2 to derive the differential temperature and MOC (meridional overturning circulation) and show that both contain no free parameters hence can be veritabily tested against observation. This equation also aids the later expanded discussion of the ice-albedo feedback (Section 3.4).*

**1. Does the paper address relevant scientific questions within the scope of ESD?**

Yes, the manuscript discusses implications of the postulated basic thermodynamic principle of maximum entropy production on the interactions of continental configuration, ocean heat transport and land/sea ice extent.

**2. Does the paper present novel concepts, ideas, tools, or data?**

I would prefer leaving the judgement of this to the editor and other reviewers. The presented core idea is relating the major cycles of global glaciation on Earth to the continental configuration based on the concept of maximum entropy production using a highly idealized box model.

**3. Are substantial conclusions reached?**

Yes, the main conclusions reached is the claim that the major cycles of global glaciation (none, polar, and pan-glaciation) are determined by the continental configuration only and the sea-ice albedo feedback plays a negligible role for pan-glacial states during Earth's history.

**4. re the scientific methods and assumptions valid and clearly outlined?**

I have problems of relating my understanding of the ice-albedo feedback with the applied model

One assumption that from my point of view is key to the importance of the presented results is the treatment of the ice-albedo feedback in the applied model. This is quite unclear to me.

An explicit assumption regarding ocean albedo and how it changes with the formation of sea ice as well as the albedo of snow/ice covered land is not made. However, in line 246 it is mentioned that there is an ice-albedo feedback in the model. How is it incorporated?

- *I plan to expand the discussion of ice-albedo feedback by way of bifurcation diagram, which progresses from iceball earth to tropical waterbelt (Braun 2022a) to divergent land-ice line to MEP. I will show that differing land/sea-ice lines are sufficient to render tropical glaciation*

*abutting open ocean, thus forgoing the need of waterbelt, and the sea-ice line moreover would be expelled to the pole by MEP, thus thwarting the runaway ice-albedo.*

- *With the added differential heat equation, it's readily seen that ocean would be open so long as there is differential temperature to institute OHT maximized by MEP. Only when the tropical ocean is also cooled to the freezing point in shutting down of OHT could there be runaway ice-albedo to produce the iceball. I shall further argue however that such iceball is untenable when MEP is applied to the global-mean field (Section 2).*
- *It is easy to argue that the land-ice line is marked by above-freezing temperature since you need finite ablation to counter the accumulation. I shall add discussion about how this marking temperature can be derived (Ou 2023) and that its deduced value ( $\sim 5^{\circ}\text{C}$ ) is commensurate with the current observation of the Greenland ice sheet.*

Another aspect that from my point of view may have a strong impact on the sea ice extent, but is not considered here, is the potential formation of high latitude sea glaciers that may be  $\sim 1\text{km}$  thick and thus cause gravitational spread of sea ice towards the equator (see Fig. 16 in Hoffman et al., 2017). Please clarify, or justify why the inclusion of this effect may not be necessary.

- *Sea glacier is preconditioned on sea ice formation, both are products of models and remain to be validated by observation, as noted by Eyles (2008) "no sedimentary evidence of sea ice for all glacio-epochs, contrary to models".*

Lines 228 to 230: This content relates to my questions regarding sea ice. I do not understand the following formulation:

*"and with the differential temperature fixed as such, MEP implies a maximized OHT. This leads immediately to vanishing perennial ice since any such ice would curb the ocean cooling hence OHT, contravening its maximization"*

- *With the added differential heat equation, I shall expand the relevant discussion, as seen below.*

Specific points, I do not understand, are:

1) To what (value/state) is the differential temperature fixed, and why does MEP then imply maximized OHT?

- *A freezing-point cold box uniquely specifies the warm-box temperature (given the global-mean temperature, see Fig. 3) hence the differential temperature. Since entropy production is the product of OHT and the differential temperature, MEP would maximize the OHT.*

2) Is atmospheric heat transport also considered here? If not, why?

- *This will be included in the added discussion of Section 2. Specifically, MEP of atmosphere would link differential SAT to SST and yields equipartition of ocean/atmosphere heat transport at mid-latitudes, the latter being broadly consistent with observation.*

3) Why do sea ice formation and maximized OHT exclude each other?

- *Sea ice would block the ocean cooling to reduce OHT, contravening MEP. On the other hand, MEP operates on millennial timescale (Ou 2018) hence does not preclude seasonal ice. This is*

*the reason that although the subpolar water is covered by winter ice during the last ice age, it remains open in summer (de Vernal et al. 2005). This observation incidentally conflicts with the ice line depicted in prevailing bifurcation diagrams.*

Besides that, mostly, the assumptions are clearly outlined. Some of the assumptions require further clarification; see list below.

Line 164: Assumption on orography to produce glacier flow towards sea. In this context a discussion of Walsh et al., 2019 might be beneficial.

- *This paragraph is confusing and will be rewritten. Thanks for pointing out Walsh et al. (2019), which is indeed relevant. In particular, the presence of highland is critical in seeding the sea-level ice sheet, which is not sufficiently emphasized.*

line 181: The assumption on cloud albedo seems very strong, given the zonal-mean cloud albedo of present-day climate; cf e.g. Södergren and McDonald, 2022; Fig. 1 c). I suggest to further justify this assumption and include a sensitivity test of the derived results regarding this assumption. E.g., how would results look like for polar/tropical cloud albedo of 0.4/0.2 ?

- *If one sets cloud reflectance of 0.7 (Hartmann 2015, his Table 3.2) and 70% cloud cover in high-latitudes (Michibata et al. 2019, their Fig. 1), the cloud albedo would be 0.5, which is commensurate with observation (Donohoe and Battisti 2011, their Fig. 3; Södergren and McDonald 2022, their Fig. 1c). I will add this discussion in the revision.*
- *I will discuss qualitative dependence and sensitivity of the model solution. I shall also stress that given the crude model and uncertain parameters, the model results should be interpreted as qualitative and plausible.*

line 182: land reflectance. I suggest to also include a sensitivity test here.

- *I plan to reduce land reflectance from 0.5 to 0.3 to conform more closely to observation (Hartmann 2015, his Table 4.2 for desert). A sensitivity statement will be included, as seen above.*

## **5. Are the results sufficient to support the interpretations and conclusions?**

Besides my points lined out above (4.): If accepting the principle of MEP and the assumptions made throughout the manuscript, the presented theory seems to support the interpretations and conclusions.

- *As I stated earlier, I will expand the discussion of MEP.*

## **6. Is the description of experiments and calculations sufficiently complete and precise to allow their reproduction by fellow scientists (traceability of results)?**

Yes, as far as I see the equations provided throughout the manuscript allow the calculation of the qualitative results shown in the figures.

I have two points, though:

L173: Although it is explained, I do not understand why the factor 2 needs to be taken into account here.

- *I will rephrase the sentence: Since  $A$  is the fractional area of the global surface,  $A/(1/2)=2A$  is its fraction of the cold box hence an albedo of  $2A_r$ . I might have to add Ou (2023b) about hemispheric symmetry of the polar albedo.*

Regarding Fig 3c: Why is there unglaciated polar land for  $T_2 = 0^\circ\text{C}$  ?

- *Keen observation, I shall amend the drawing.*

**7. Do the authors give proper credit to related work and clearly indicate their own new/original contribution?**

Yes.

**8. Does the title clearly reflect the contents of the paper?**

Yes.

**9. Does the abstract provide a concise and complete summary?**

Yes.

**10. Is the overall presentation well structured and clear?**

The structure of the manuscript is clear. However I have problems in relating sections 2 and 3.

- *Valid point, I shall strengthen the logical progression from Section 2 to 3.*

E.g., in section 2 the author refers to MEP based on turbulent wind, whereas in section 3, the author discusses MEP in the context of ocean heat transport.

- *MEP is a selection rule hence can be applied hierarchically first to the global-mean (Ou 2001) and then the differential fields. For the global mean, entropy production is roughly the surface dissipation hence varies as turbulent wind. For the differential field, on the other hand, the entropy production is dominated by latitudinal variation of temperature—not the turbulent wind, which would translate to the product of OHT with differential temperature. I will add this point in the revision.*

**11. Is the language fluent and precise?**

In my perception the language used throughout the article hinders to access the content of the article. This is mainly due to some of the used vocabulary and sentence structure. To some extent the language even appears offensive to me (e.g. the usage of the word “flawed”).

- *I will moderate my critique.*

**12. Are mathematical formulae, symbols, abbreviations, and units correctly defined and used?**

In Fig. 3 b) the meaning of “l” labelling the right hand side axis is not mentioned in the figure caption.

- *The ice extent is wrong, it should cover the globe ocean (see Response 2 to Comment 4).*

It is not clear to me, whether A and A\* refer to land area or land area fraction.

- *Besides stating at the beginning of Section 3.1 that “all areas are expressed in fractions of the global surface”, I shall add it to the caption of Fig. 3.*

**13. Should any parts of the paper (text, formulae, figures, tables) be clarified, reduced, combined, or eliminated?**

As mentioned in 10. I would appreciate more guidance on relating sections 2 and 3.

- *See Response 1 to Comment 10.*

**14. Are the number and quality of references appropriate?**

Yes

**15. Is the amount and quality of supplementary material appropriate?**

There is no supplementary material. I would appreciate if a sensitivity study of relevant parameters would be added here (see point 4 for suggestions).

- *See Response 11 to Comment 4.*

**General comment**

From my point of view more complex approaches of modeling climate states of Earth’s past based on dynamic three-dimensional equations serve to focus on single aspects of Earth system dynamics. Yet, I see the point of the author, that these approaches are highly idealized and thus may overlook the interaction of fundamental processes. I do not see a strong conflict between the approach based on MEP presented here and more complex modeling approaches of pan-glacial states on Earth. Thus, I would appreciate and recommend to include a discussion of how the presented main conclusion in this manuscript relates to more complex modeling approaches lined out below. The points below are partly taken from Braun, 2022 chapter 2.3. Cryogenian waterbelt scenarios; see there for further details.

- *There should be no difference between MEP and primitive-equation models if the latter have resolved eddies. The nonclosure of the latter lies in sub-grid parameterization containing free parameters, such as diapycnal diffusivity, on which the MOC depends sensitively hence is finely tuned to yield the current climate. MEP on the hand contains no free parameters (should be distinguished from uncertain but physical quantities) hence is potentially prognostic. Paradoxically, since MEP-deduced MOC depends only on air/sea exchange coefficient for a temperate state, climate models of tuned MOC may retain its prognostic utility of a changed climate, the difficulty however amplifies for the glacial state when MOC is no longer fixed but maximized. Resolving eddies requires grid spacing of 0.3 degree or less, which obviously poses a significant challenge, but there is a possible phenomenological approach in bypassing this*

*requirement, as discussed in Ou (2023a, his Section 5). I plan to include the above point in my revision.*

1) Hyde et al., 2000 found tropical land ice with a sea ice edge located at 25° lat and a continuous transition between this climate state and climate states with less ice cover, i.e. without an ice-albedo feedback. They applied “GCM GENESIS 2 coupled to a thermodynamic mixed-layer ocean and thermodynamic sea ice, neglecting ocean and sea-ice dynamics”.

- *They used ice-sheet model to produce ice-covered land, which is then coupled to the ocean. Since the sea ice has not reached the bifurcation point, it remains regulable by forcing. Although their mixed-layer ocean provides only minor heating, it is nonetheless sufficient to keep the sea ice at bay given their forcing. The paper underscores the importance of ice-sheet dynamics, which generally would produce more expansive land- than sea-ice.*

2) Based on simulations with the GCM FOAM, Poulsen et al. (2001) “found iceball states with mixed-layer ocean but not with a fully coupled ocean”, i.e. in their model “ocean heat transport counteracts the expansion of sea ice towards the equator”.

- *They show that ocean dynamics would strongly augment OHT of a mixed-layer ocean in deterring the iceball earth. But since their grid spacing is greater than 1 degree hence does not resolve eddies, we argue that it has not fully captured the OHT effect.*

3) Based on a “coupled ocean–atmosphere model of intermediate complexity (CLIMBER-2)”, “Donnadieu et al. (2004b) considered the major stabilizing effect on the simulated waterbelt climate to be meridional atmospheric heat transport via the Hadley circulation.”

- *Their ocean grids are 2.5 degrees wide, too coarse to resolve eddies. I also have reservation about prescribing pCO<sub>2</sub> to probe the climate response (see Introduction).*

4) Rose (2015) found that “ocean heat convergence at the ice edge driven by a feedback between ice extent, wind stress and ocean circulation was found to stabilize the waterbelt state”.

- *Many mechanisms have been proposed in stabilizing the waterbelt, which is not a robust feature (Braun et al. 2022b). In any event, as I discussed in Responses 1 and 2 to Comment 4, one need not invoke tropical waterbelt to maintain an open ocean.*

### **Further remarks**

l30: Please explain abbreviation pCO<sub>2</sub> l55: Please clarify the statement regarding the unbalanced initial state.

- *I will add its descriptor: the partial pressure of atmospheric CO<sub>2</sub>.*
- *The sudden reduction of solar forcing would cause sea ice to grow to the bifurcation point before OHT operating on decadal timescale has time to act, perhaps the reason they see no difference if OHT is shut off. I will expand the discussion of this point.*

L78: What does external conditions explicitly refer to?

- *The external perturbation of the climate is the tectonics, which is the changing paleogeography in our case. I will add this statement.*

L105: Please explain the expression “linear in the corresponding blackbody 105 radiance”.

- *I should just state “x-axis is the blackbody radiance of the surface”. In any event, I will remove this figure since without the full closure considered in Ou (2001), the figure raises more questions than it answers.*

L162 to 165: I find it hard to follow and understand the argument about the marking temperature (here and throughout the text)

- *I will expand the discussion of the glacial marking temperature (perhaps change to land-ice line temperature?) and refer to Ou (2023a) for details. It involves ice dynamics and mass balance, rendering this temperature an intrinsic property of the ice sheet, and the deduced temperature of about 5°C is consistent with the present Greenland ice sheet.*

L225: High obliquity hypothesis: The box model assumes a specific zonal distribution of radiative forcing to polar/tropical boxes. The high obliquity hypothesis is based on the recognition that zonal distribution of radiative forcing changes. Thus, the distribution of radiative forcing to polar and tropical regions in the box model would need to be adjusted for application to a high obliquity state. I suggest to discuss this or apply the box model with modified radiative forcing to further investigate this statement.

- *The high obliquity hypothesis assumes reversal of differential heating. There is no evidence of such orbital or glaciation reversal.*

L314, 315: See my point regarding cloud albedo in present-day climate above.

- *See Response 10 to Comment 4.*

## References

Hoffman, Paul F., Dorian S. Abbot, Yosef Ashkenazy, Douglas I. Benn, Jochen J. Brocks, Phoebe A. Cohen, Grant M. Cox, et al. “Snowball Earth Climate Dynamics and Cryogenian Geology-Geobiology.” *Science Advances* 3, no. 11 (2017). <https://doi.org/10.1126/sciadv.1600983>.

Walsh, Amber, Thomas Ball, and David M Schultz. “Extreme Sensitivity in Snowball Earth Formation to Mountains on PaleoProterozoic Supercontinents.” *Scientific Reports* 9, no. 1 (2019): 1–7. <https://doi.org/10.1038/s41598-019-38839-6>.

Södergren, A. H., and A. J. McDonald. “Quantifying the Role of Atmospheric and Surface Albedo on Polar Amplification Using Satellite Observations and CMIP6 Model Output.” *Journal of Geophysical Research: Atmospheres* 127, no. 12 (2022): e2021JD035058. <https://doi.org/10.1029/2021JD035058>.

Braun, dissertation 2022: <https://publikationen.bibliothek.kit.edu/1000150229>

Hyde, William T, Thomas J Crowley, Steven K Baum, and W Richard Peltier. “Neoproterozoic ‘Snowball Earth’ Simulations with a Coupled Climate/Ice-Sheet Model.” *Nature* 405, no. 6785 (2000): 425–29. <https://doi.org/10.1038/35013005>.

Poulsen, Christopher J., Raymond T. Pierrehumbert, and Robert L. Jacob. "Impact of Ocean Dynamics on the Simulation of the Neoproterozoic 'Snowball Earth.'" *Geophysical Research Letters* 28, no. 8 (2001): 1575–78. <https://doi.org/10.1029/2000GL012058>.

Donnadieu, Yannick, Yves Godd ris, Gilles Ramstein, Anne N d lec, and Joseph Meert. "A 'Snowball Earth' Climate Triggered by Continental Break-up through Changes in Runoff." *Nature* 428, no. 6980 (2004): 303–6.

Rose, Brian E. J. "Stable 'Waterbelt' Climates Controlled by Tropical Ocean Heat Transport: A Nonlinear Coupled Climate Mechanism of Relevance to Snowball Earth." *Journal of Geophysical Research: Atmospheres* 120, no. 4 (2015): 1404–23. <https://doi.org/10.1002/2014JD022659>.

*Cited references:*

Braun, dissertation 2022a: <https://publikationen.bibliothek.kit.edu/1000150229>

Braun C, H rner J, Voigt A, Pinto JG (2022b) Ice-free tropical waterbelt for Snowball Earth events questioned by uncertain clouds. *Nat Geosci* (6):489-93 <https://doi.org/10.1038/s41561-022-00950-1>

de Vernal A, Eynaud F, Henry M, Hillaire-Marcel C, Londeix L, Mangin S, Matthiessen J, Marret F, Radi T, Rochon A, Solignac S, Turon JL (2005) Reconstruction of sea surface conditions at middle to high latitudes of the Northern Hemisphere during the Last Glacial Maximum (LGM) based on dinoflagellate cyst assemblages. *Quat Sci Rev* (24):897–924 <https://doi.org/10.1016/j.quascirev.2004.06.014>

Donohoe A, Battisti DS (2011) Atmospheric and surface contributions to planetary albedo. *J Clim* 24:4402-18 <https://doi.org/10.1175/2011jcli3946.1>

Eyles N (2008) Glacio-epochs and the supercontinent cycle after ~ 3.0 Ga: tectonic boundary conditions for glaciation. *Palaeogeogr Palaeoclimatol Palaeoecol* 258(1-2):89-129 <https://doi.org/10.1016/j.palaeo.2007.09.021>

Hartmann DL (2015) *Global physical climatology*. Academic Press, New York, 411 pp

Klein SA, Hartmann DL (1993) The seasonal cycle of low stratiform clouds. *J Clim* 6(8):1587-606 [https://doi.org/10.1175/1520-0442\(1993\)006<1587:tscols>2.0.co;2](https://doi.org/10.1175/1520-0442(1993)006<1587:tscols>2.0.co;2)

Michibata T, Suzuki K, Sekiguchi M, Takemura T. Prognostic precipitation in the MIROC6-SPRINTARS GCM: Description and evaluation against satellite observations. *Journal of Advances in Modeling Earth Systems*. 2019 Mar;11(3):839-60.

Ou HW (2018) Thermohaline circulation: a missing equation and its climate change implications. *Clim Dyn* 50:641-53 <https://doi.org/10.1007/s00382-017-3632-y>

Ou HW (2023a) A theory of orbital-forced glacial cycles: resolving Pleistocene puzzles. *J Mar Sci Eng* 11(3):564 <https://doi.org/10.3390/jmse11030564>

Ou HW (2023b) Hemispheric symmetry of planetary albedo: a corollary of nonequilibrium thermodynamics. *Atmosphere* 14:1243 <https://doi.org/10.3390/atmos14081243>
